# Supplementary material
Source: PubMed Central journal article supplement (PMC6375810)
Supplement: NIHMS985788-supplement-Supp_figS1-5.pdf [file NIHMS985788-supplement-Supp_figS1-5.pdf]

**Figure S1.** Flow cytometry phenotyping of splenic immune cell subsets from naive *C5ar1<sup>fl/fl</sup>* controls and *C5ar1<sup>fl/fl</sup> x LysM-Cre* mice. n=3-4/ group

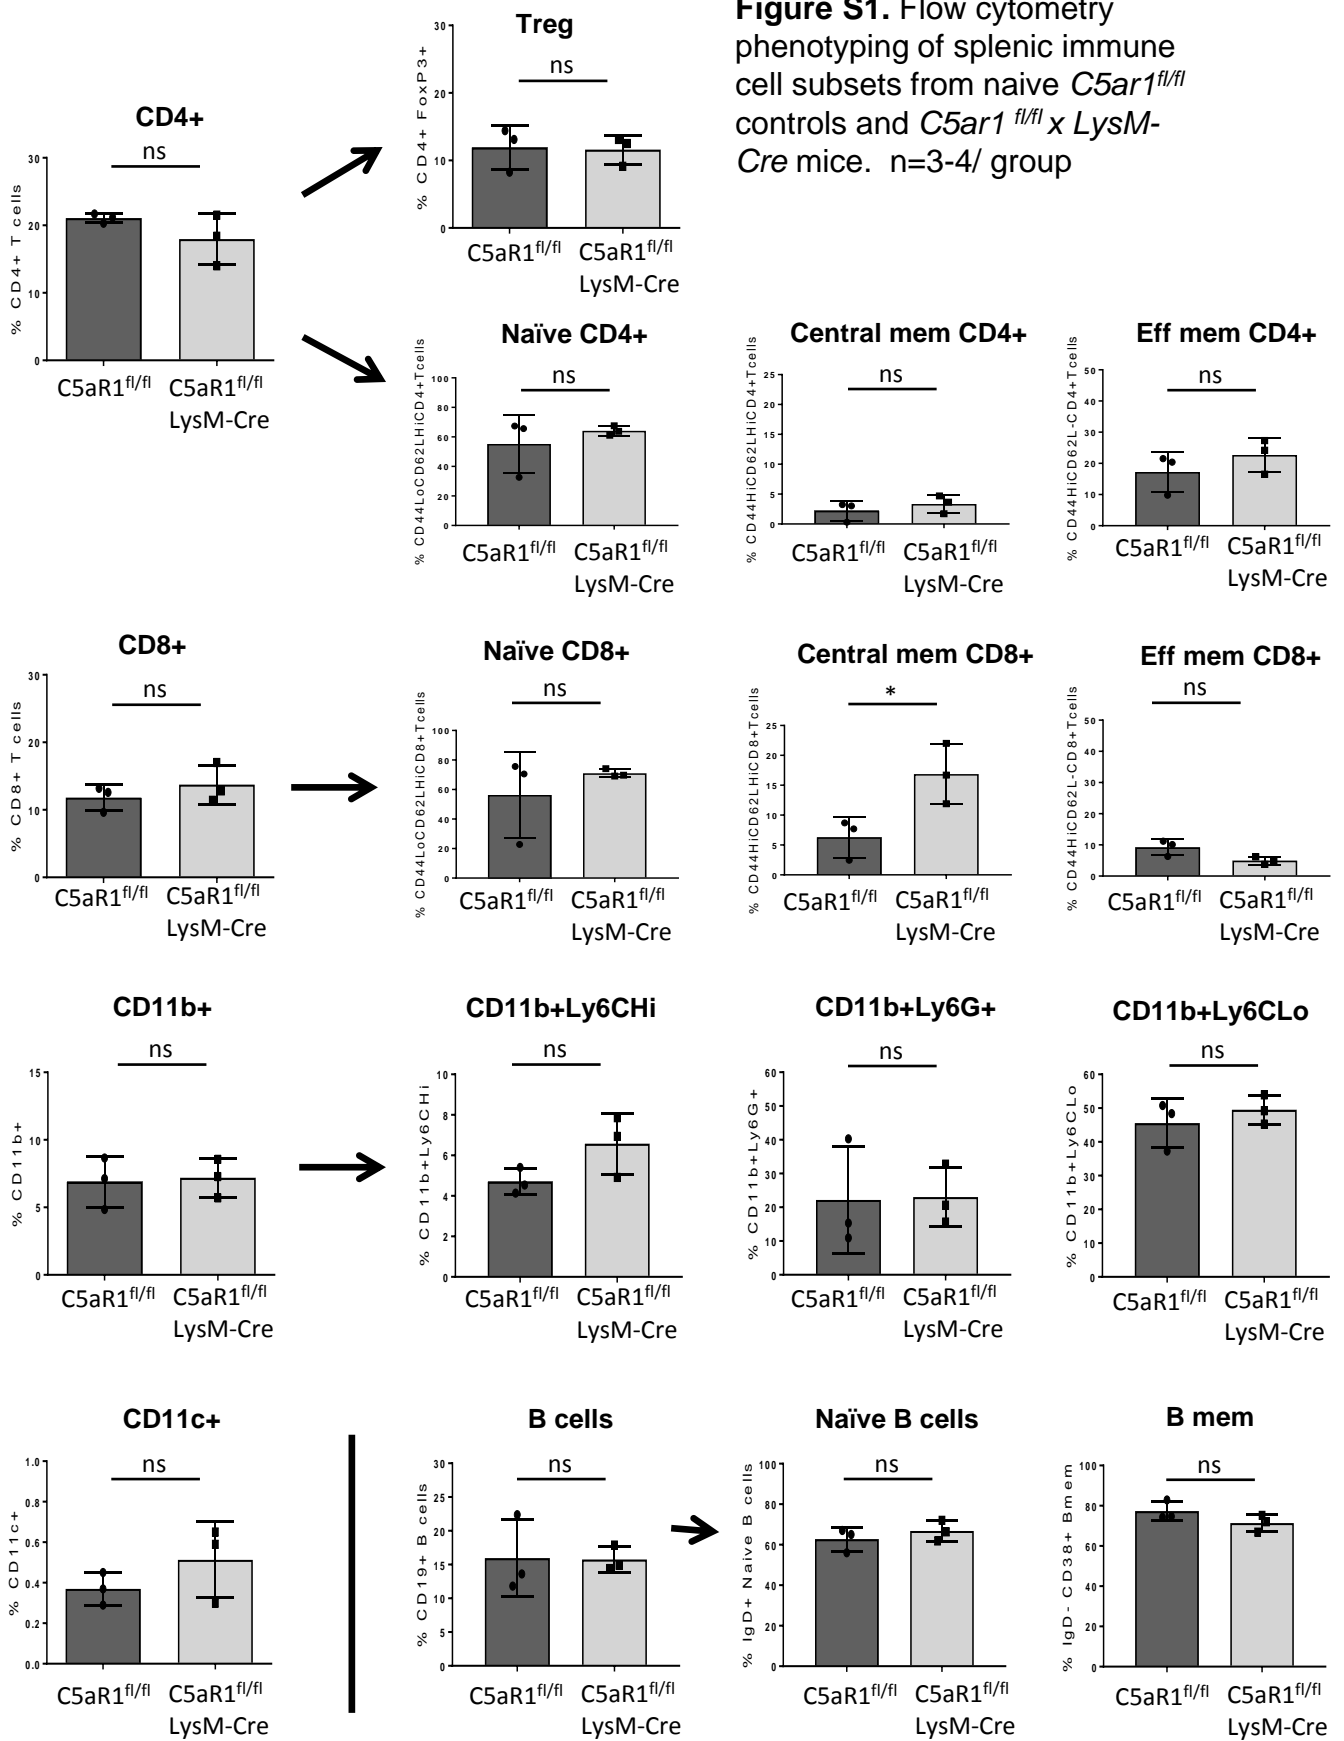

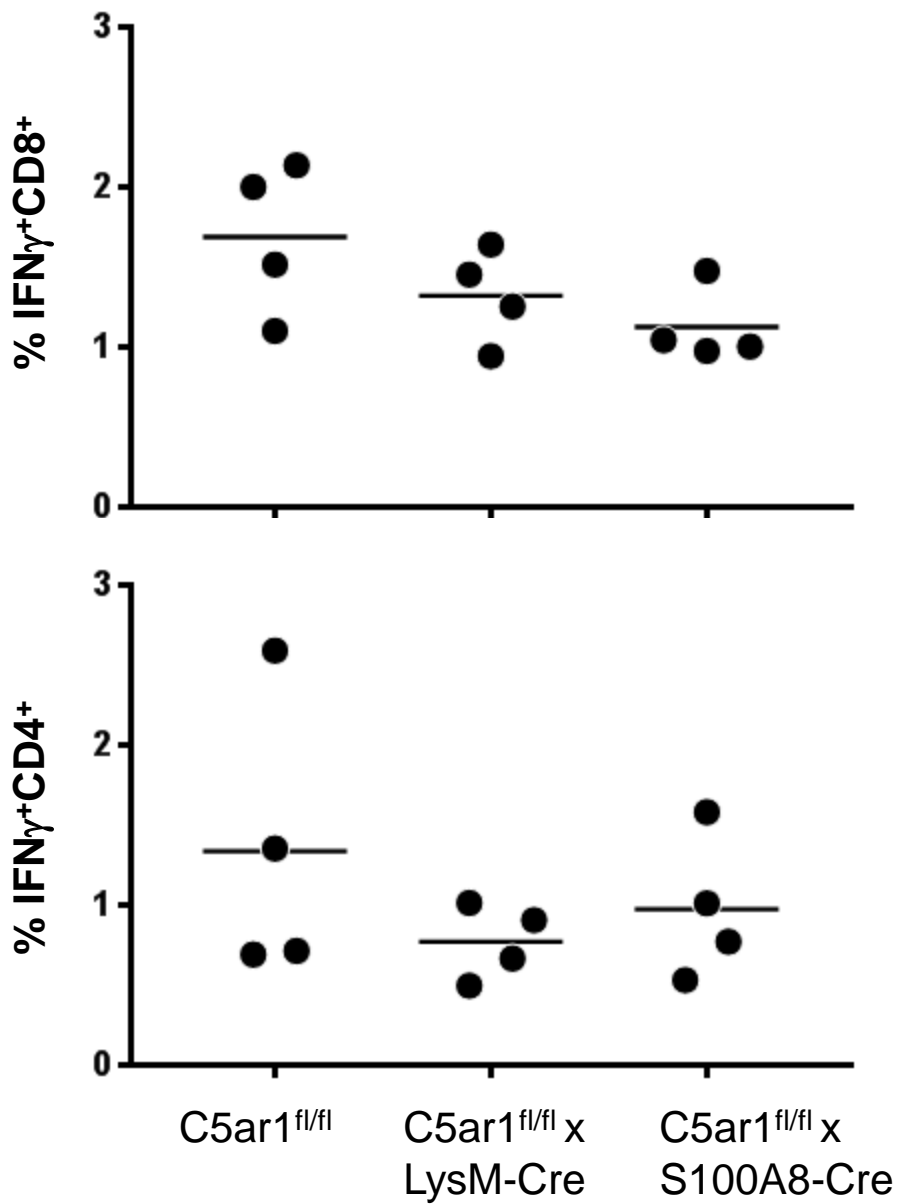

**Figure S2.** Spleen cells from naive *C5ar1<sup>fl/fl</sup>*, and *C5ar1<sup>fl/fl</sup> x LySM-Cre* and *C5ar1<sup>fl/fl</sup> x S100A8-Cre* mice were cultured with allogeneic BALB/c APCs overnight and stained for intracellular IFN $\gamma$  within CD8<sup>+</sup> cells (top) or CD4<sup>+</sup> cells (bottom). No differences were noted among groups n=4/group.

**Figure S3.** Representative flow cytometry plots depicting C5aR1 expression on neutrophils (top) and monocytes (bottom) from  $C5ar1^{fl/fl}$  controls (solid line) and  $C5ar1^{fl/fl} \times S100A8-Cre$  (dashed line) mice. Filled grey area represents staining of the isotype control antibody n=3-4/ group

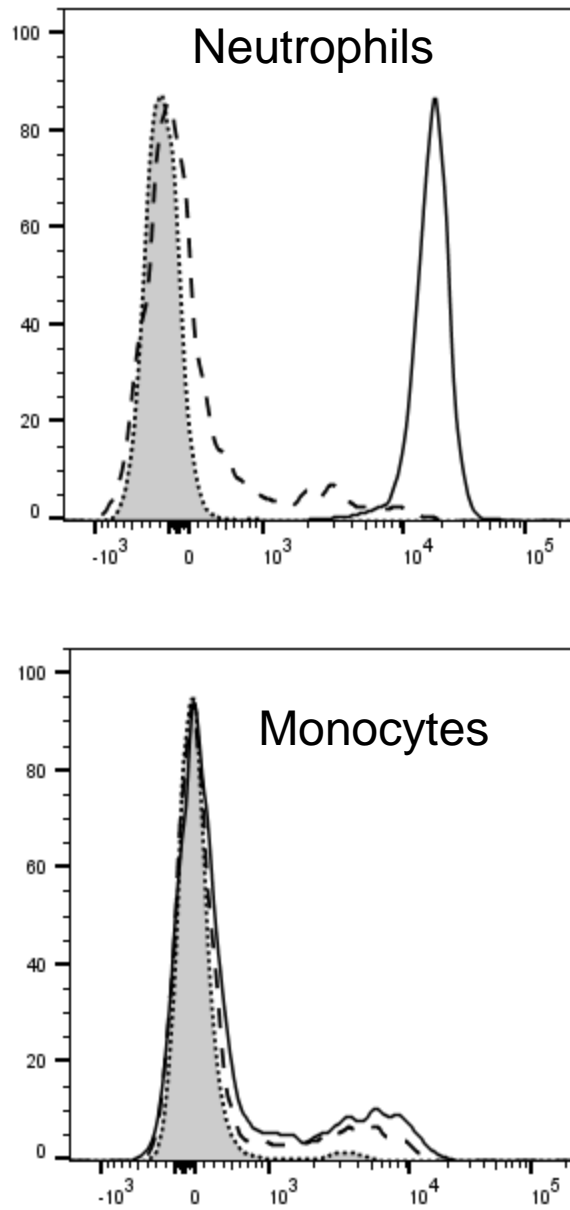

**Figure S4.** Flow cytometry phenotyping of splenic immune cell subsets from naive *C5ar1<sup>fl/fl</sup>* controls and *C5ar1<sup>fl/fl</sup> x S100A8-Cre* mice. n=3-4/ group

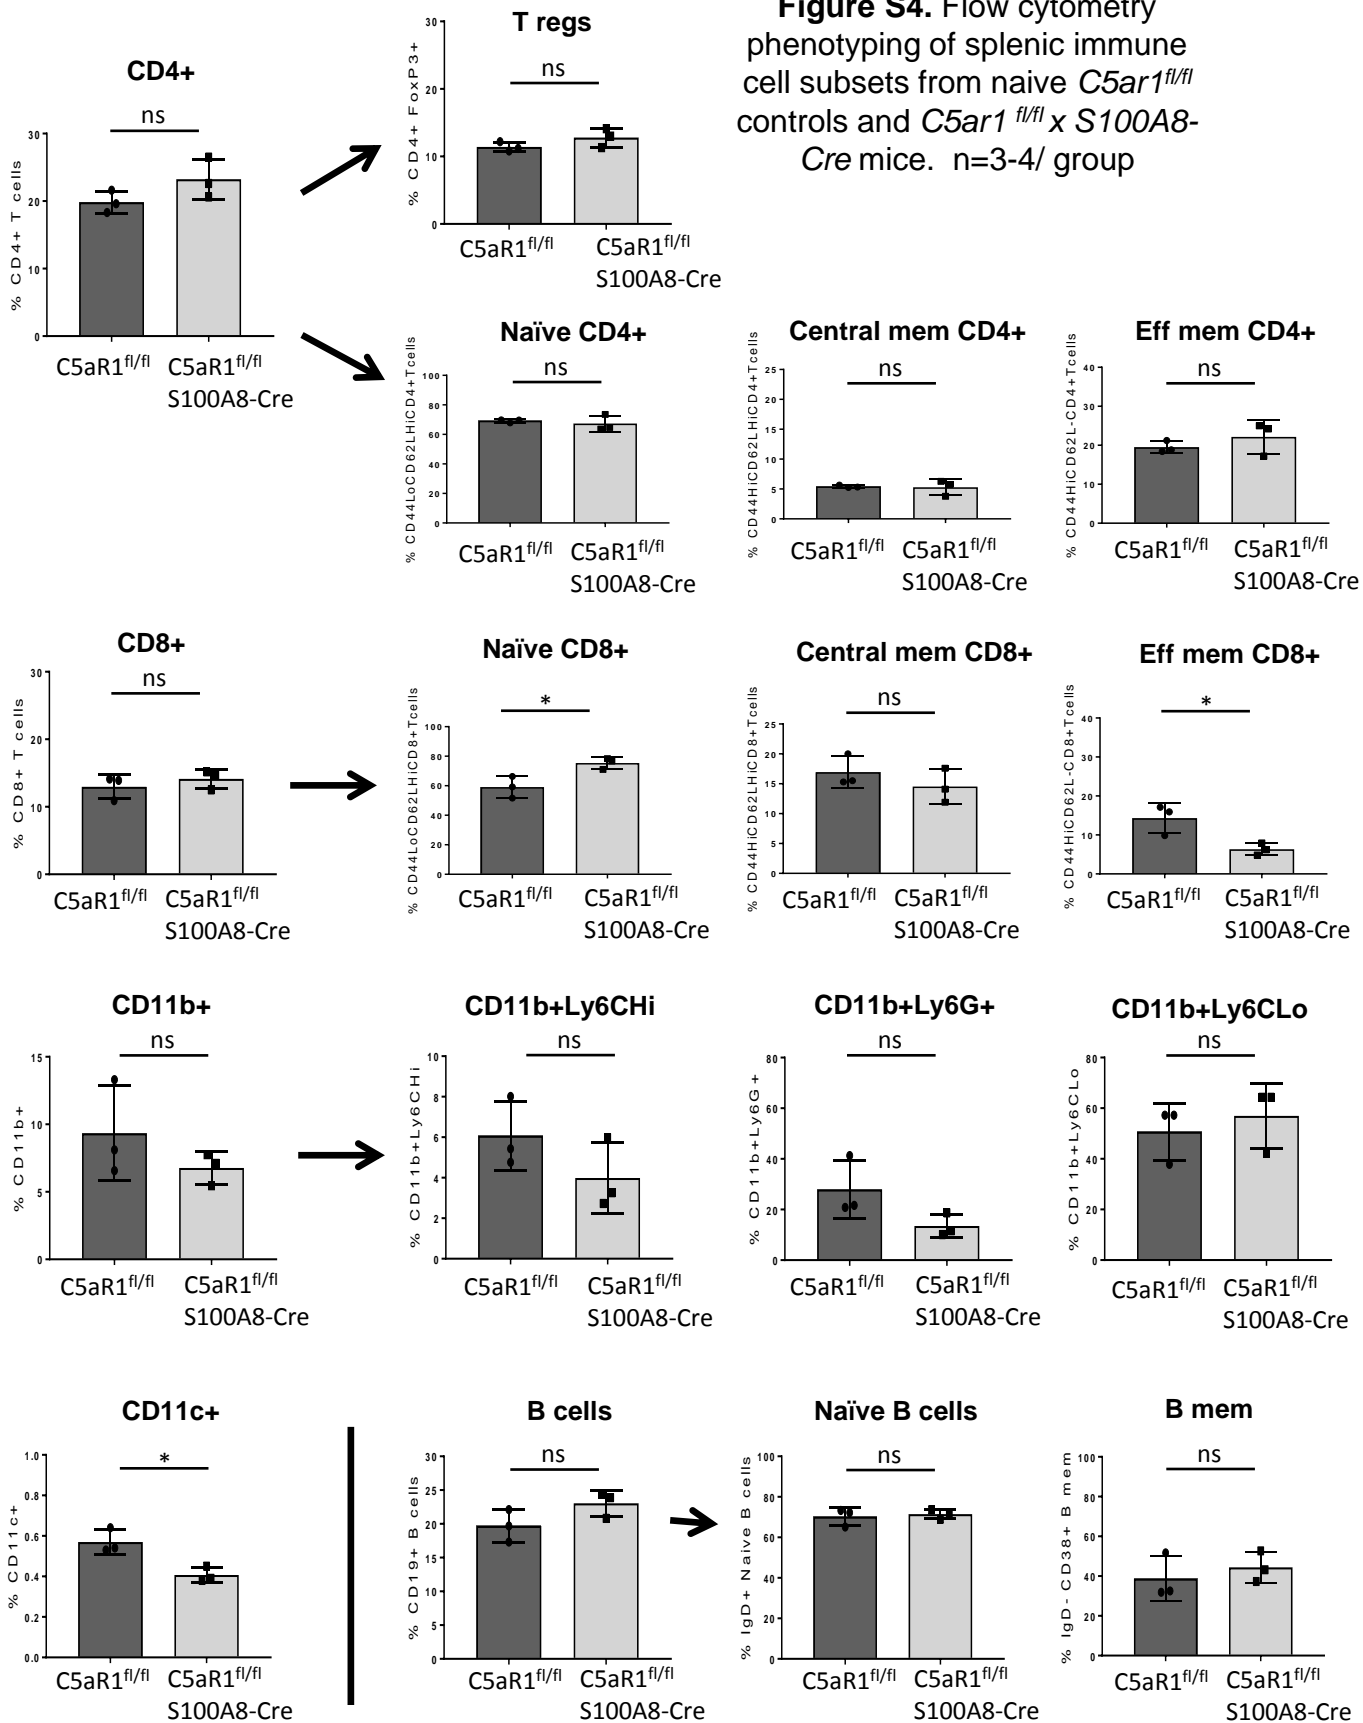

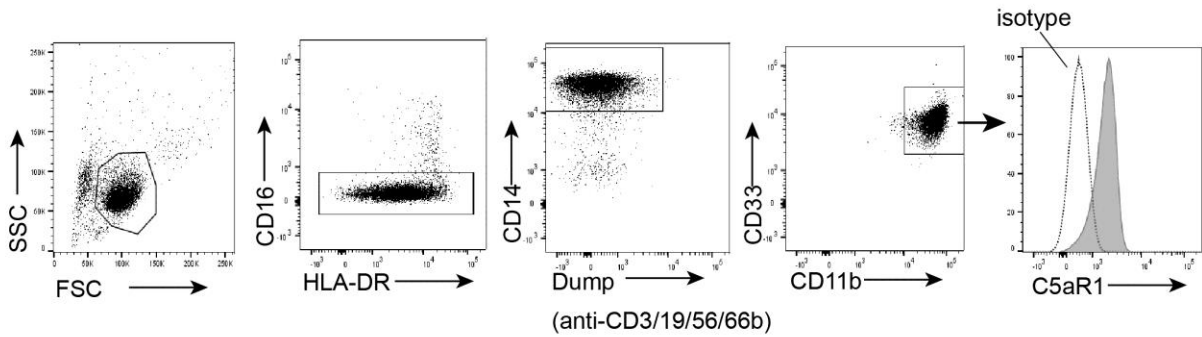

### Figure S5

Human peripheral blood HLA-DR+D15+CD11b+CD33+ monocytes express C5aR1  
 Representative flow cytometry plots showing gating strategy and C5aR1 expression on monocytes from commercially purchased plasmaphoresis PBMC after negatively selecting on CD14+ cells
